# Supplementary material
Source: publisher figshare collection journal article supplement (https://sage.figshare.com/ndownloader/files/20161892)
Supplement: Supplementary file 1 [file 20161892]

## Online Supplemental Material

*Study 1 Survey as Presented to Participants on Qualtrics***Please answer the following questions.**

1. To your knowledge, it is legal for a suspect under the influence of alcohol to waive their Miranda rights (i.e., agree to talk to police without an attorney present).

Yes, it's legal. (1)  
I think so. (2)  
I don't know. (3)  
I don't think so. (4)  
No, it's not legal. (5)

2. To your knowledge, it is legal for a suspect under the influence of alcohol to undergo a police interrogation.

Yes, it's legal. (1)  
I think so. (2)  
I don't know. (3)  
I don't think so. (4)  
No, it's not legal. (5)

3. To your knowledge, are statements made to police by intoxicated suspects during interrogation admissible in court?

Yes, they are admissible. (1)  
I think so. (2)  
I don't know. (3)  
I don't think so. (4)  
No, they're not admissible. (5)

---

*In the United States, if a suspect is intoxicated, the police are allowed to read the suspect his Miranda rights (i.e., the right to remain silent, have an attorney, etc.) and obtain a waiver of those rights. Also, police are allowed to interrogate intoxicated suspects and use their statements against them in court. Please answer the following questions considering these facts.*

4. What percent of suspects interrogated by police do you think are intoxicated?

0      10      20      30      40      50      60      70      80      90      100

% you think are intoxicated

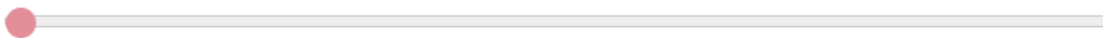

5. How likely do you think it is that an intoxicated suspect would confess to a crime that he did not commit?

1 2 3 4 5

Not at all likely

Extremely likely

6. How likely do you think it is that an intoxicated suspect would confess to a crime that he did commit?

1 2 3 4 5

Not at all likely

Extremely likely

---

*Answer the following set of questions about a suspect who was brought in for questioning after a night of drinking. The suspect's breath alcohol concentration (BrAC) was estimated to be 0.13 ml/kg (i.e., .13%), and he was apparently intoxicated. For reference, keep in mind the legal driving limit is 0.08 ml/kg (i.e., .08%), and loss of consciousness begins to occur in the 0.16-0.30% range. The intoxicated suspect waived his Miranda rights (i.e., the right to remain silent, have an attorney, etc.), and by the end of the interrogation, the intoxicated suspect confessed.*

7. Do you think the intoxicated suspect was able to knowingly, intelligently, and voluntarily waive his *Miranda* rights, as required by law?

1 2 3 4 5

Not at all able

Completely able

8. To what extent do you think the intoxicated suspect's confession is truthful?

1 2 3 4 5

Not at all truthful

Extremely truthful

9. To what extent do you think the intoxicated suspect has control over whether he lies or tells the truth?

1 2 3 4 5

No control at all

Complete control

10. Is the following equation correct?  $2 + 2 = 4$

1 2 3 4 5

No at all correct

Completely correct

11. To what extent do you think the intoxicated suspect's interrogation was coercive, as compared to an interrogation of a sober suspect?

1

2

3

4

5

Much less coercive  
than a sober suspect's  
interrogation

Much more coercive  
than a sober suspect's  
interrogation

---

**Please answer the following questions.**

12. Obtaining waivers of *Miranda* rights from intoxicated suspects should be allowed.

1

2

3

4

5

Completely disagree

Completely agree

13. Interrogating intoxicated suspects should be allowed.

1

2

3

4

5

Completely disagree

Completely agree

14. Confessions elicited from intoxicated suspects should be permissible as evidence in court.

1

2

3

4

5

Completely disagree

Completely agree

15. Will you please select 5 for this question?

1

2

3

4

5

Completely disagree

Completely agree

16. When making a verdict decision, to what extent would you rely on a confession from a sober versus intoxicated suspect as evidence indicative of guilt?

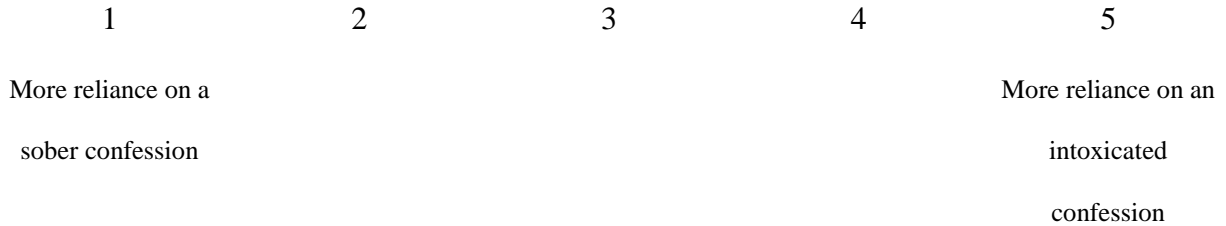

17. Who is more likely to confess: a sober guilty suspect or an intoxicated guilty suspect?

Sober guilty suspect more likely to confess      Intoxicated guilty suspect more likely to confess

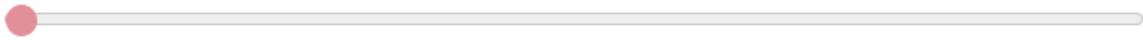

18. Who is more likely to confess: a sober innocent suspect or an intoxicated innocent suspect?

Sober innocent suspect more likely to confess      Intoxicated innocent suspect more likely to confess

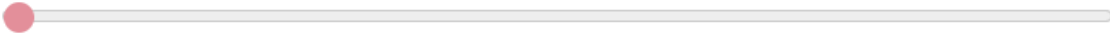

**Please answer the following questions.**

19. How likely is that you personally would confess to a crime that you did not commit if you were intoxicated?

|                   |   |   |                  |   |
|-------------------|---|---|------------------|---|
| 1                 | 2 | 3 | 4                | 5 |
| Not at all likely |   |   | Extremely likely |   |

20. How likely is that you personally would confess to a crime that you did commit if you were intoxicated?

|                   |   |   |                  |   |
|-------------------|---|---|------------------|---|
| 1                 | 2 | 3 | 4                | 5 |
| Not at all likely |   |   | Extremely likely |   |

Table 5

*Correlations Among Study 1 Variables*

|    | 1      | 2      | 3      | 4      | 5      | 6      | 7      | 8      | 9      | 10     | 11     | 12     | 13     | 14     | 15    | 16 | 17 | 18 |
|----|--------|--------|--------|--------|--------|--------|--------|--------|--------|--------|--------|--------|--------|--------|-------|----|----|----|
| 1  | 1      |        |        |        |        |        |        |        |        |        |        |        |        |        |       |    |    |    |
| 2  | .54**  | 1      |        |        |        |        |        |        |        |        |        |        |        |        |       |    |    |    |
| 3  | .43**  | .48**  | 1      |        |        |        |        |        |        |        |        |        |        |        |       |    |    |    |
| 4  | -.02   | .05    | <.01   | 1      |        |        |        |        |        |        |        |        |        |        |       |    |    |    |
| 5  | .14**  | .14**  | .18**  | .15**  | 1      |        |        |        |        |        |        |        |        |        |       |    |    |    |
| 6  | .01    | .05    | .03    | .01    | .22**  | 1      |        |        |        |        |        |        |        |        |       |    |    |    |
| 7  | -.27** | -.16** | -.18** | .03    | -.24** | -.08*  | 1      |        |        |        |        |        |        |        |       |    |    |    |
| 8  | -.17** | -.16** | -.15** | <.01   | -.26** | .10**  | .36**  | 1      |        |        |        |        |        |        |       |    |    |    |
| 9  | -.16** | -.14** | -.16** | -.02   | -.29** | -.12** | .49**  | .41**  | 1      |        |        |        |        |        |       |    |    |    |
| 10 | .09*   | .07*   | .02    | -.09** | .16**  | .03    | -.14** | -.09*  | -.08*  | 1      |        |        |        |        |       |    |    |    |
| 11 | -.35** | -.25** | -.22** | .08*   | -.29** | -.05   | .51**  | .34**  | .34**  | -.23** | 1      |        |        |        |       |    |    |    |
| 12 | -.27** | -.31** | -.26** | .08*   | -.34** | -.03   | .44**  | .37**  | .38**  | -.21** | .68**  | 1      |        |        |       |    |    |    |
| 13 | -.23** | -.25** | -.29** | .11**  | -.36** | -.08*  | .44**  | .34**  | .37**  | -.26** | .65**  | .73**  | 1      |        |       |    |    |    |
| 14 | -.08*  | -.07*  | -.11** | .10**  | -.16** | -.03   | .29**  | .22**  | .25**  | -.14** | .35**  | .32**  | .38**  | 1      |       |    |    |    |
| 15 | .13**  | .05    | .03    | -.07*  | .07*   | .27**  | -.07*  | .05    | -.12** | .10**  | -.09*  | -.04   | -.06   | -.07*  | 1     |    |    |    |
| 16 | .02    | -.01   | <.01   | -.08*  | .21**  | .07    | -.15** | -.16** | -.17** | .19**  | -.20** | -.21** | -.22** | -.20** | .15** | 1  |    |    |

|    |     |        |      |       |       |       |        |        |        |       |        |        |        |       |       |       |       |   |
|----|-----|--------|------|-------|-------|-------|--------|--------|--------|-------|--------|--------|--------|-------|-------|-------|-------|---|
| 17 | .07 | .04    | .05  | .10** | .38** | .07   | -.11** | -.17** | -.16** | .13** | -.18** | -.26** | -.24** | -.07* | -.04  | .16** | 1     |   |
| 18 | .03 | >-.01† | -.03 | .07*  | .06   | .26** | -.04   | .07    | -.06   | .03   | -.01   | .01    | .02    | -.01  | .10** | -.03  | .34** | 1 |

*Note.* All variables are explained in detail in the Method section: 1 = legality of intoxicated *Miranda* waivers; 2 = legality of interrogating an intoxicated suspect; 3 = courtroom admissibility of statements made by intoxicated suspect; 4 = percentage estimate of suspects who are interrogated by police that are intoxicated; 5 = likelihood that an intoxicated suspect would falsely confess; 6 = likelihood that an intoxicated suspect would truthfully confess; 7 = hypothetical case: ability of intoxicated suspect to appropriately waive his *Miranda* rights; 8 = hypothetical case: intoxicated suspect's confession was truthful; 9 = hypothetical case: the intoxicated suspect's control over whether he lied or told the truth; 10 = hypothetical case: extent to which the intoxicated suspect's interrogation was coercive as compared to an interrogation of a sober suspect; 11 = permissibility of obtaining *Miranda* waivers from intoxicated suspects; 12 = permissibility of interrogating intoxicated suspects; 13 = permissibility of confessions elicited from intoxicated suspects being used as evidence in court; 14 = rely on a confession from a sober versus intoxicated suspect as evidence indicative of guilt; 15 = a sober guilty suspect or an intoxicated guilty suspect more likely to confess?; 16 = a sober innocent suspect or an intoxicated innocent suspect more likely to confess?; 17 = likelihood that they themselves would falsely confess while intoxicated; 18 = likelihood that they themselves would truthfully confess while intoxicated. \*\* Indicates significance at the .01 level. \* Indicates significance at the .05 level. † $r = -.003$ .

Table 6

*Correlations Among Study 2 Variables*

|                           | Interrogation Perceptions | Defendant Perceptions | Confession Influence | PJAQ Composite Score |
|---------------------------|---------------------------|-----------------------|----------------------|----------------------|
| Interrogation Perceptions | 1                         |                       |                      |                      |
| Defendant Perceptions     | .65**                     | 1                     |                      |                      |
| Confession Influence      | -.25**                    | -.26**                | 1                    |                      |
| PJAQ Composite Score      | .03                       | -.01                  | .14**                | 1                    |

*Note.* The sample size for the confession influence variable is  $n = 467$ ;  $N = 915$  for all other variables. \*\* Indicates significance at the .01 level.
